# Supplementary material
Source: PubMed Central journal article supplement (PMC7660420)
Supplement: mmc1.pdf [file mmc1.pdf]

**PATTER, Volume 1**

**Supplemental Information**

**Cell-Type-Specific Proteogenomic Signal**

**Diffusion for Integrating Multi-Omics**

**Data Predicts Novel Schizophrenia Risk Genes**

**Abolfazl Doostparast Torshizi, Jubao Duan, and Kai Wang**

## Supplementary Figures

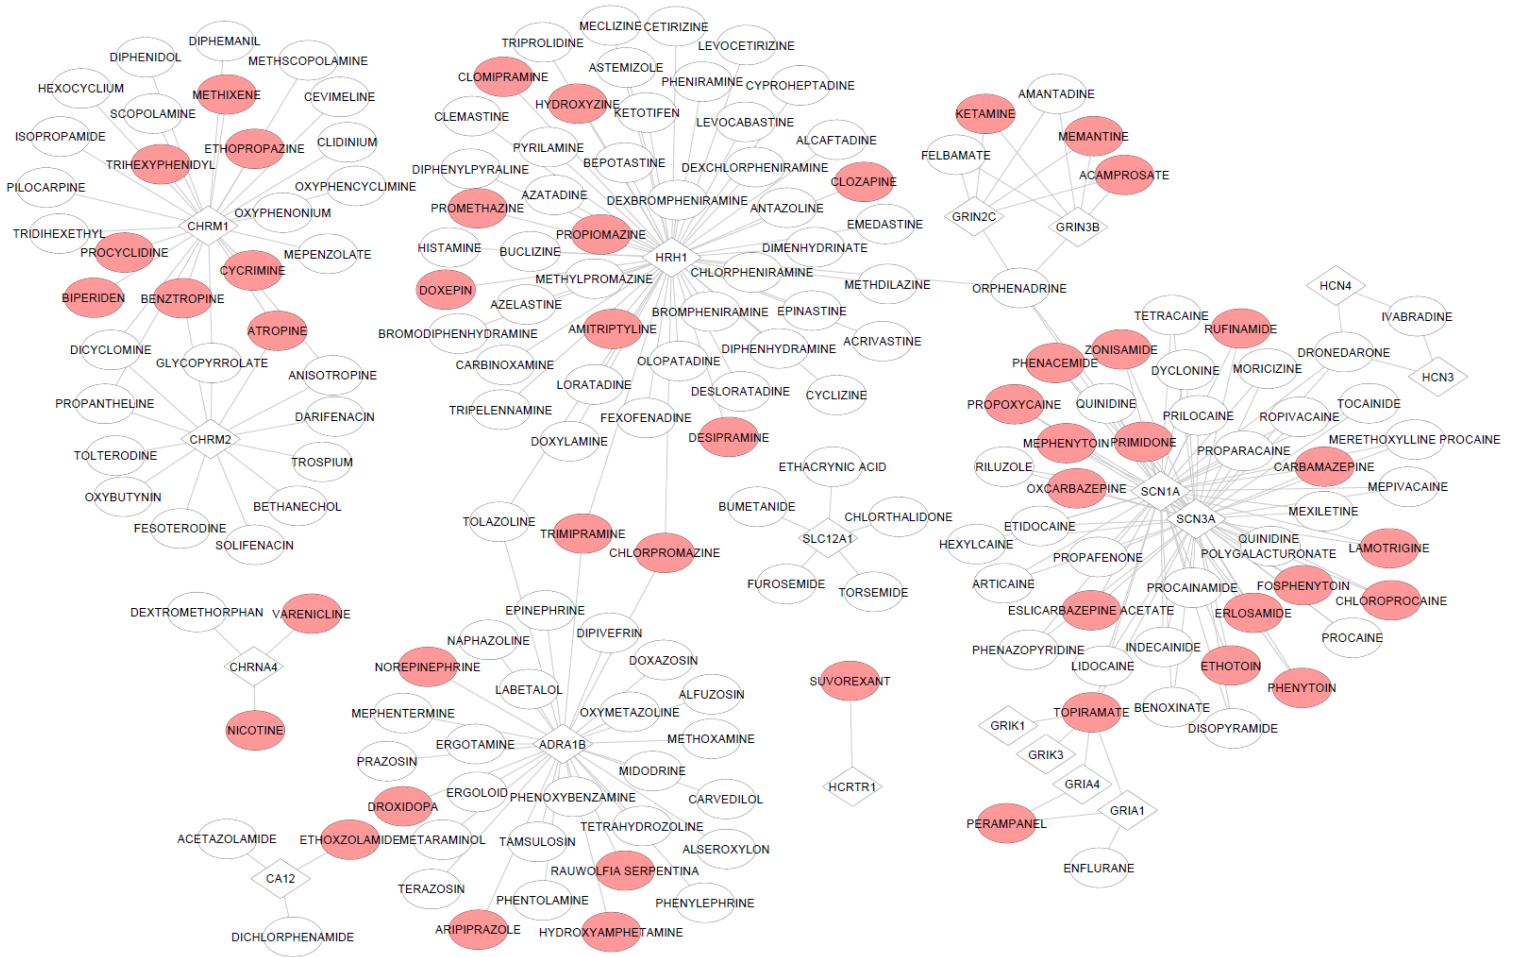

*Supplementary Fig 1. Drug-target network representation of MAPSD risk genes and their corresponding FDA-approved drugs. Genes are denoted by diamonds and drugs are denoted by ovals. Red nodes represent the drugs developed for the diseases related to central nervous system.*
